# Supplementary material for: HIV-1 transmitted drug resistance mutations among antiretroviral therapy-Naïve individuals in Surabaya, Indonesia
Source: PubMed Central journal article supplement (PMC4336490; doi:10.1186/s12981-015-0046-y), 2015-02-22
Supplement: 12981_2015_46_MOESM1_ESM.pdf [file 12981_2015_46_MOESM1_ESM.pdf]

Additional file 1

Detailed patient information of each participant

| Patient ID | Group | Date of sample collection | Age | Gender | Likely transmission route | PR (n=52) |                          | RT (n=47)      |                          | Assigned subtype |
|------------|-------|---------------------------|-----|--------|---------------------------|-----------|--------------------------|----------------|--------------------------|------------------|
|            |       |                           |     |        |                           | Subtype*  | GenBank accession number | Subtype*       | GenBank accession number |                  |
| SM2        | CSW   | Oct-12                    | 26  | Female | Heterosexual              | CRF01_AE  | KJ865301                 | CRF01_AE       | KJ865353                 | CRF01_AE         |
| SM11       | CSW   | Oct-12                    | -   | Female | Heterosexual              | Subtype B | KJ865302                 | B/<br>CRF01_AE | KJ865354                 | B/CRF01_AE       |
| SM15       | CSW   | Oct-12                    | 29  | Female | Heterosexual              | CRF01_AE  | KJ865303                 | -              | -                        | CRF01_AE         |
| SM18       | CSW   | Oct-12                    | 23  | Female | Heterosexual              | CRF01_AE  | KJ865304                 | CRF01_AE       | KJ865355                 | CRF01_AE         |
| SM26       | CSW   | Oct-12                    | 30  | Female | Heterosexual              | CRF01_AE  | KJ865305                 | CRF01_AE       | KJ865356                 | CRF01_AE         |
| SM35       | CSW   | Oct-12                    | 29  | Female | Heterosexual              | CRF01_AE  | KJ865306                 | CRF01_AE       | KJ865357                 | CRF01_AE         |
| SM44       | CSW   | Oct-12                    | 25  | Female | Heterosexual              | -         | -                        | CRF01_AE       | KJ865358                 | CRF01_AE         |
| SM51       | CSW   | Nov-12                    | 28  | Female | Heterosexual              | CRF01_AE  | KJ865307                 | CRF01_AE       | KJ865359                 | CRF01_AE         |
| SM56       | CSW   | Nov-12                    | 31  | Female | Heterosexual              | -         | -                        | CRF01_AE       | KJ865360                 | CRF01_AE         |
| SM65       | CSW   | Nov-12                    | 29  | Female | Heterosexual              | -         | -                        | CRF01_AE       | KJ865361                 | CRF01_AE         |
| PJ22       | CSW   | Nov-12                    | 27  | Female | Heterosexual              | CRF01_AE  | KJ865308                 | CRF01_AE       | KJ865362                 | CRF01_AE         |
| PJ28       | CSW   | Nov-12                    | 41  | Female | Heterosexual              | CRF01_AE  | KJ865309                 | CRF01_AE       | KJ865363                 | CRF01_AE         |
| PJ37       | CSW   | Nov-12                    | 22  | Female | Heterosexual              | CRF01_AE  | KJ865310                 | CRF01_AE       | KJ865364                 | CRF01_AE         |
| PJ39       | CSW   | Nov-12                    | 35  | Female | Heterosexual              | CRF01_AE  | KJ865311                 | CRF01_AE       | KJ865365                 | CRF01_AE         |
| PJ68       | CSW   | Nov-12                    | 27  | Female | Heterosexual              | CRF01_AE  | KJ865312                 | CRF01_AE       | KJ865366                 | CRF01_AE         |
| PJ81       | CSW   | Nov-12                    | 40  | Female | Heterosexual              | CRF01_AE  | KJ865313                 | CRF01_AE       | KJ865367                 | CRF01_AE         |

|       |     |        |    |        |              |                |          |                  |          |              |
|-------|-----|--------|----|--------|--------------|----------------|----------|------------------|----------|--------------|
| PJ90  | CSW | Dec-12 | 23 | Female | Heterosexual | CRF01_AE       | KJ865314 | CRF01_AE         | KJ865368 | CRF01_AE     |
| PJ105 | CSW | Dec-12 | 41 | Female | Heterosexual | -              | -        | CRF01_AE         | KJ865369 | CRF01_AE     |
| PJ109 | CSW | Dec-12 | 42 | Female | Heterosexual | CRF01_AE       | KJ865315 | CRF01_AE         | KJ865370 | CRF01_AE     |
| PJ117 | CSW | Dec-12 | 27 | Female | Heterosexual | CRF01_AE       | KJ865316 | CRF01_AE         | KJ865371 | CRF01_AE     |
| PJ119 | CSW | Dec-12 | 35 | Female | Heterosexual | CRF01_AE       | KJ865317 | -                | -        | CRF01_AE     |
| PJ121 | CSW | Dec-12 | 26 | Female | Heterosexual | G/<br>CRF01_AE | KJ865318 | A/G/<br>CRF01_AE | KJ865372 | A/G/CRF01_AE |
| IDU1  | IDU | Apr-13 | 31 | Male   | IDU          | CRF01_AE       | KJ865319 | CRF01_AE         | KJ865373 | CRF01_AE     |
| IDU2  | IDU | Apr-13 | 37 | Male   | IDU          | Subtype B      | KJ865320 | Subtype B        | KJ865374 | Subtype B    |
| IDU3  | IDU | Apr-13 | 41 | Female | IDU          | CRF01_AE       | KJ865321 | CRF01_AE         | KJ865375 | CRF01_AE     |
| IDU4  | IDU | Jun-13 | 33 | Male   | IDU          | CRF01_AE       | KJ865322 | CRF01_AE         | KJ865376 | CRF01_AE     |
| IDU5  | IDU | Jun-13 | 36 | Male   | IDU          | Subtype B      | KJ865323 | Subtype B        | KJ865377 | Subtype B    |
| IDU7  | IDU | Jun-13 | 33 | Male   | IDU          | CRF01_AE       | KJ865324 | CRF01_AE         | KJ865378 | CRF01_AE     |
| IDU9  | IDU | Jun-13 | 33 | Male   | IDU          | CRF01_AE       | KJ865325 | CRF01_AE         | KJ865379 | CRF01_AE     |
| IDU10 | IDU | Jun-13 | 30 | Male   | IDU          | CRF01_AE       | KJ865326 | CRF01_AE         | KJ865380 | CRF01_AE     |
| IDU11 | IDU | Jun-13 | 24 | Male   | IDU          | CRF01_AE       | KJ865327 | B/<br>CRF01_AE   | KJ865381 | B/CRF01_AE   |
| IDU12 | IDU | Jun-13 | 37 | Male   | IDU          | CRF01_AE       | KJ865328 | CRF01_AE         | KJ865382 | CRF01_AE     |
| IDU13 | IDU | Jun-13 | 45 | Male   | IDU          | CRF01_AE       | KJ865329 | CRF01_AE         | KJ865383 | CRF01_AE     |
| IDU14 | IDU | Jun-13 | 35 | Male   | IDU          | CRF01_AE       | KJ865330 | CRF01_AE         | KJ865384 | CRF01_AE     |
| IDU15 | IDU | Jun-13 | 35 | Male   | IDU          | CRF01_AE       | KJ865331 | -                | -        | CRF01_AE     |
| IDU16 | IDU | Jun-13 | 32 | Male   | IDU          | -              | -        | Subtype B        | KJ865385 | Subtype B    |
| IDU17 | IDU | Jun-13 | 32 | Male   | IDU          | CRF01_AE       | KJ865332 | -                | -        | CRF01_AE     |

|       |          |        |    |        |              |           |          |           |          |           |
|-------|----------|--------|----|--------|--------------|-----------|----------|-----------|----------|-----------|
| IDU18 | IDU      | Jun-13 | 29 | Male   | IDU          | CRF01_AE  | KJ865333 | CRF01_AE  | KJ865386 | CRF01_AE  |
| UA4   | hospital | Oct-12 | -  | Female | heterosexual | CRF01_AE  | KJ865334 | CRF01_AE  | KJ865387 | CRF01_AE  |
| UA6   | hospital | Oct-12 | 43 | Male   | heterosexual | CRF01_AE  | KJ865335 | CRF01_AE  | KJ865388 | CRF01_AE  |
| UA7   | hospital | Jan-13 | -  | Male   | heterosexual | CRF01_AE  | KJ865336 | CRF01_AE  | KJ865389 | CRF01_AE  |
| UA8   | hospital | Feb-13 | 25 | Female | heterosexual | CRF01_AE  | KJ865337 | CRF01_AE  | KJ865390 | CRF01_AE  |
| UA14  | hospital | Oct-13 | 19 | Male   | heterosexual | Subtype B | KJ865338 | Subtype B | KJ865391 | Subtype B |
| UA15  | hospital | Oct-13 | 36 | Female | IDU          | CRF01_AE  | KJ865339 | CRF01_AE  | KJ865392 | CRF01_AE  |
| UA16  | hospital | Oct-13 | 39 | Male   | heterosexual | CRF01_AE  | KJ865340 | -         | -        | CRF01_AE  |
| UA18  | hospital | Oct-13 | 39 | Female | IDU          | CRF01_AE  | KJ865341 | -         | -        | CRF01_AE  |
| UA19  | hospital | Oct-13 | 31 | Male   | IDU          | CRF01_AE  | KJ865342 | CRF01_AE  | KJ865393 | CRF01_AE  |
| UA20  | hospital | Oct-13 | 40 | Female | heterosexual | -         | -        | Subtype B | KJ865394 | Subtype B |
| UA21  | hospital | Nov-13 | 24 | Male   | heterosexual | CRF01_AE  | KJ865343 | CRF01_AE  | KJ865395 | CRF01_AE  |
| UA23  | hospital | Nov-13 | 28 | Male   | heterosexual | CRF01_AE  | KJ865344 | -         | -        | CRF01_AE  |
| UA24  | hospital | Nov-13 | 34 | Male   | heterosexual | CRF01_AE  | KJ865345 | -         | -        | CRF01_AE  |
| UA31  | hospital | Apr-14 | 32 | Female | heterosexual | CRF01_AE  | KJ865346 | -         | -        | CRF01_AE  |
| DN1   | hospital | Mar-14 | 34 | Male   | heterosexual | CRF01_AE  | KJ865347 | -         | -        | CRF01_AE  |
| DN2   | hospital | Mar-14 | 29 | Male   | heterosexual | CRF01_AE  | KJ865348 | CRF01_AE  | KJ865396 | CRF01_AE  |
| DN3   | hospital | Mar-14 | 17 | Male   | heterosexual | CRF01_AE  | KJ865349 | CRF01_AE  | KJ865397 | CRF01_AE  |
| DN5   | hospital | Apr-14 | 40 | Female | heterosexual | CRF01_AE  | KJ865350 | -         | -        | CRF01_AE  |
| DN6   | hospital | Apr-14 | 32 | Female | heterosexual | CRF01_AE  | KJ865351 | CRF01_AE  | KJ865398 | CRF01_AE  |
| DN9   | hospital | Apr-14 | 52 | Female | heterosexual | CRF01_AE  | KJ865352 | CRF01_AE  | KJ865399 | CRF01_AE  |

\* Subtyping was performed using recombinant identification program.
