# Supplementary material for: HIV-1 transmitted drug resistance mutations among antiretroviral therapy-Naïve individuals in Surabaya, Indonesia
Source: PubMed Central journal article supplement (PMC4336490; doi:10.1186/s12981-015-0046-y), 2015-02-22

## A SM11 RT RNA

| Fragment Start Position | Uncertainty Region Start - End | Break Point Interval Start - End | Fragment End position | Fragment Subtype |
|-------------------------|--------------------------------|----------------------------------|-----------------------|------------------|
| 2550                    | -                              | 2844-2883                        | 2873                  | Subtype B        |
| 2874                    | -                              | -                                | 3311                  | CRF01_AE         |

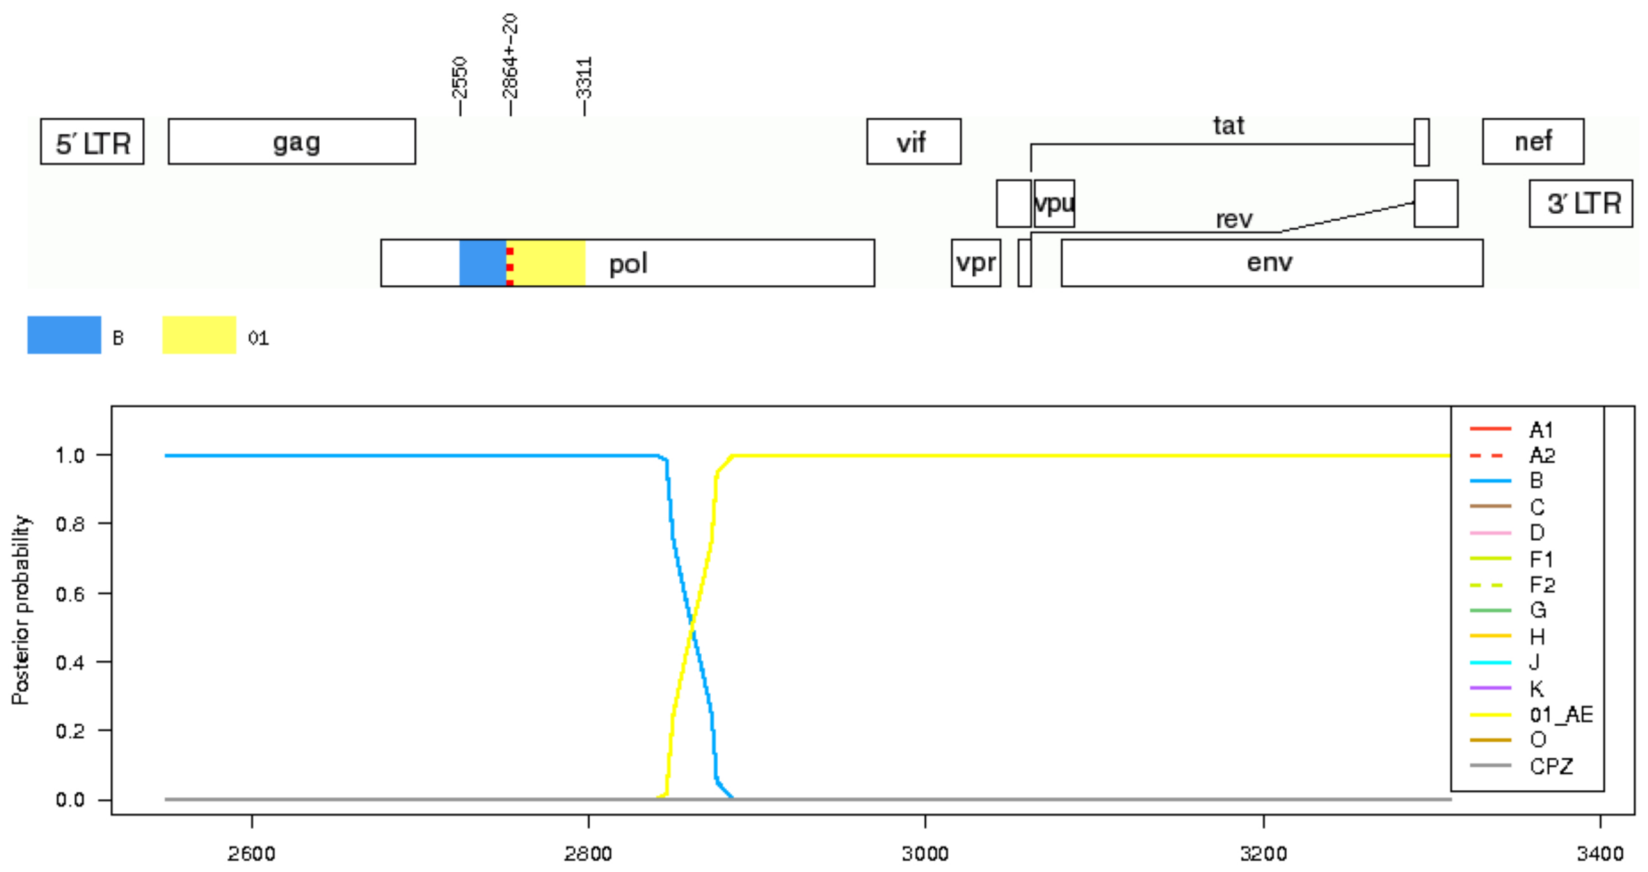

## B PJ121 RT RNA

| Fragment Start Position | Uncertainty Region Start - End | Break Point Interval Start - End | Fragment End position | Fragment Subtype |
|-------------------------|--------------------------------|----------------------------------|-----------------------|------------------|
| 2550                    | 2689-3034                      | -                                | 3034                  | Subtype A1       |
| 3035                    | 3035-3038                      | 3195-3206                        | 3195                  | Subtype G        |
| 3196                    | -                              | -                                | 3311                  | CRF01_AE         |

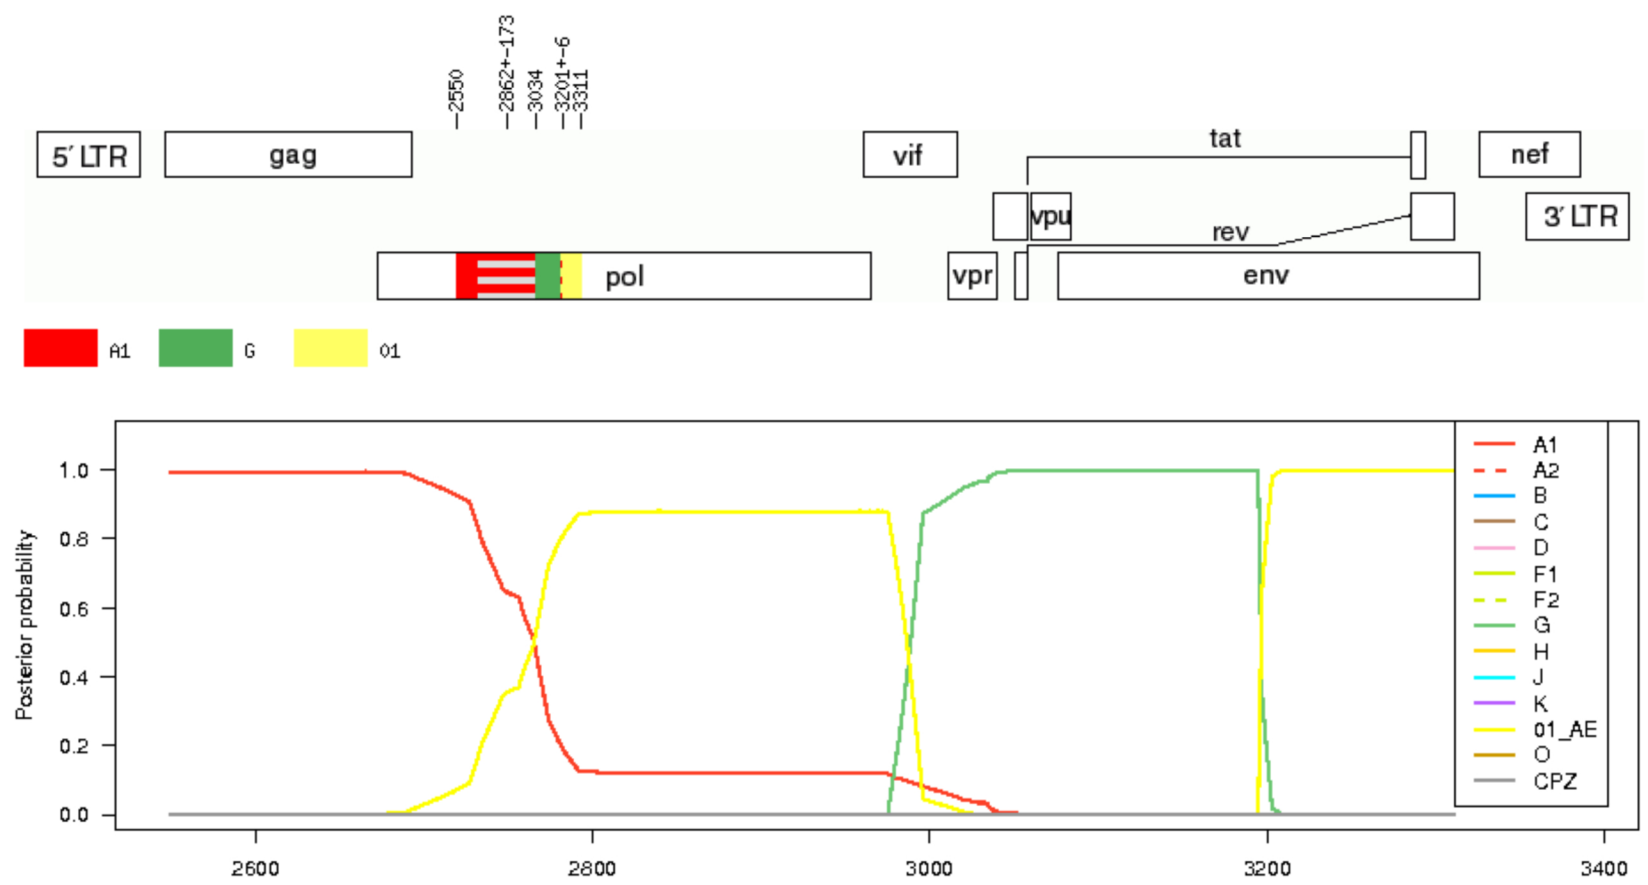

## C IDU11 RT RNA

| Fragment Start Position | Uncertainty Region Start - End | Break Point Interval Start - End | Fragment End position | Fragment Subtype |
|-------------------------|--------------------------------|----------------------------------|-----------------------|------------------|
| 2550                    | 2550 - 2888                    | -                                | 2888                  | Subtype B        |
| 2889                    | 2889 - 2909                    | -                                | 3311                  | CRF01_AE         |

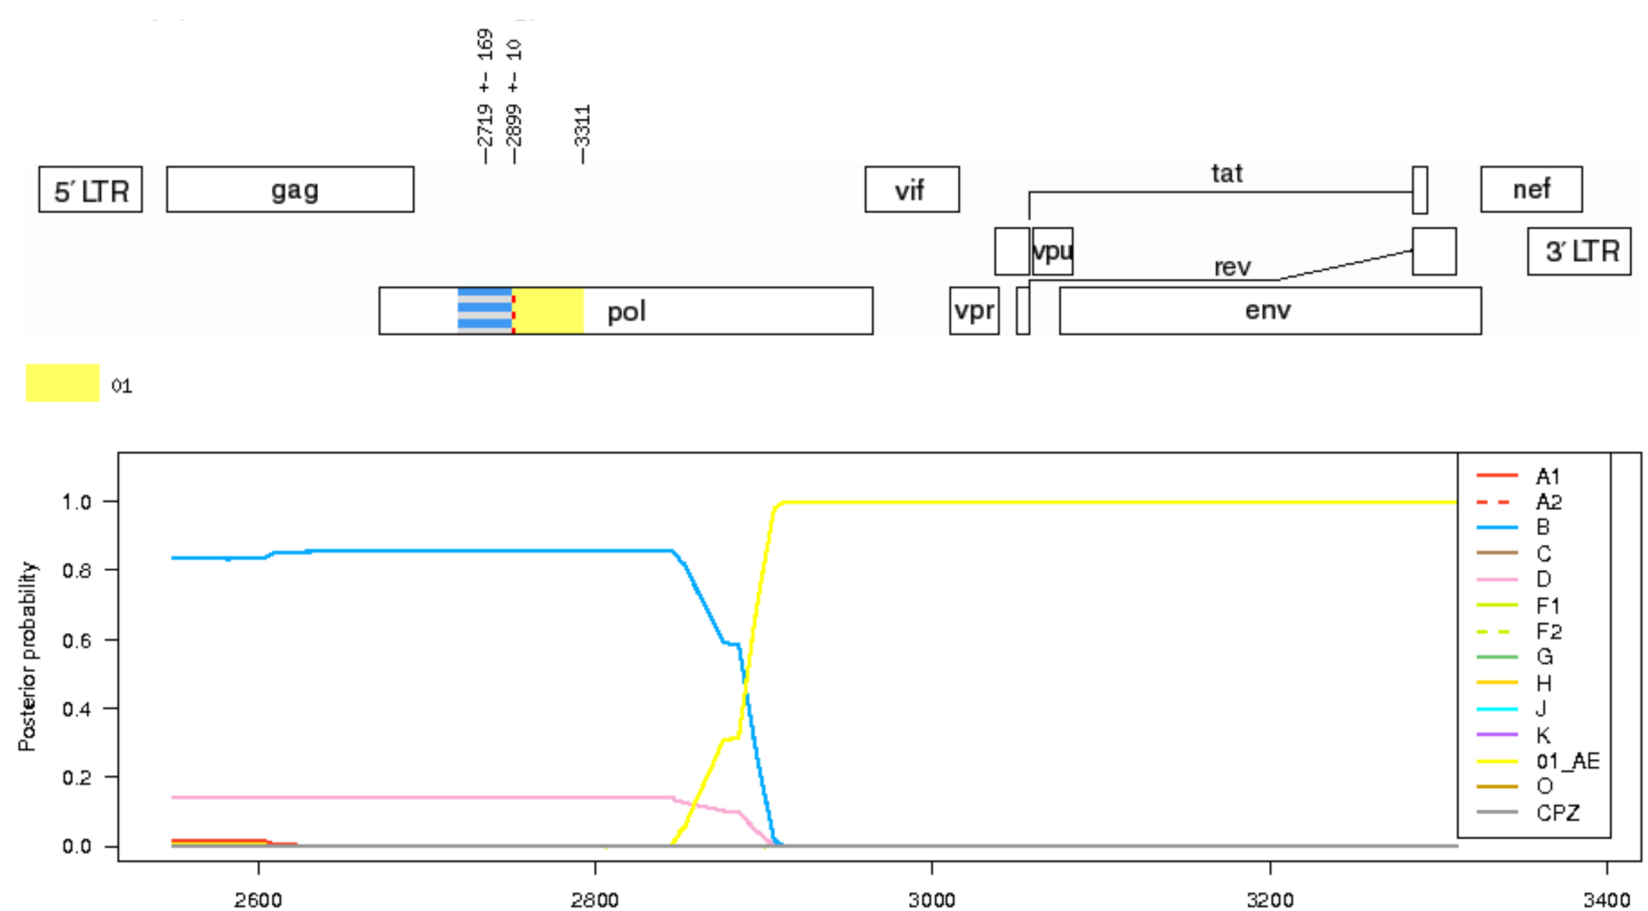

Supplement: 12981_2015_46_MOESM2_ESM.pdf [file 12981_2015_46_MOESM2_ESM.pdf]
