# Supplementary material for: HIV-1 transmitted drug resistance mutations among antiretroviral therapy-Naïve individuals in Surabaya, Indonesia
Source: PubMed Central journal article supplement (PMC4336490; doi:10.1186/s12981-015-0046-y), 2015-02-22
Supplement: 12981_2015_46_MOESM3_ESM.pdf [file 12981_2015_46_MOESM3_ESM.pdf]

Additional file 3

Primer information

| Name            | Sequence                                               | Nucleotide position* | Usage                   |
|-----------------|--------------------------------------------------------|----------------------|-------------------------|
| K-env-R1        | 5'-CCAATCAGGGAAGAAGCCTTG-3'                            | 9168 to 9148         | Reverse transcription   |
| Pr-S1           | 5'-TTTCTTCAGAGCAGACCAGAGCCAACAGC-3'                    | 2131 to 2159         | PR first PCR sense      |
| RT-A1           | 5'-GCTTTTATTTTTTCTTCTGTCAATGGCCA-3'                    | 2647 to 2619         | PR first PCR antisense  |
| ProCT-S-PvuI    | 5'-GCCGATCGCGATCGACAAGGAACTGTATCCTTTAGCTTCCCTCAGATC-3' | 2220 to 2261         | PR nested PCR sense     |
| RT-CA2-A S-ClaI | 5'-GTATCGATAGGACTAATGGGAAAATT TA-3'                    | 2569 to 2542         | PR nested PCR antisense |
| RT1L            | 5'-ATGATAGGGGGAATTGGAGGTTT-3'                          | 2388 to 2410         | RT first PCR sense      |
| GPR2M           | 5'-GGACTACAGTCYACTTGTCCATG-3'                          | 4402 to 4380         | RT first PCR antisense  |
| RT7L            | 5'-GACCTACACCTGTCAACATAATTGG-3'                        | 2485 to 2509         | RT nested PCR sense     |
| GPR3L           | 5'-TTAAAATCACTARCCATTGYTCTCC-3'                        | 4309 to 4285         | RT nested PCR antisense |

\* Nucleotide position was based on a HIV-1 reference strain, HXB2 (GenBank accession no. K03455).
